# Supplementary material for: An NIF-doped ZIF-8 hybrid membrane for continuous antimicrobial treatment
Source: Royal Society of Chemistry journal article supplement (doi:10.1039/d0ra00108b), 2020-01-01
Supplement: d0ra00108b1.pdf [file d0ra00108b1.pdf]

Supporting Information

## Niflumic acid-doped ZIF-8 hybrid membrane for continuous antimicrobial treatment

Dan Luo<sup>a</sup>, Cuijuan Wang<sup>\*a</sup>, Yan Tong<sup>\*a</sup>, Cheng Liu<sup>a</sup>, Yumei Xiao<sup>a</sup>, Zixin Zhu<sup>a</sup>, DongNing Liu<sup>a</sup>, Yaoyu Wang<sup>b</sup>

<sup>a</sup>.school of Life Science and Engineering, Southwest Jiaotong University, Chengdu, 610000,China.Email:wangcuijuan@home.swjtu.edu.cn.

<sup>b</sup>.key Laboratory of Synthetic and Natural Functional Molecule Chemistry of Ministry of Education, Department of Chemistry, Northwest University, Xi'an 710069, China. Email: ejuan6046@163.com † Footnotes relating to the title and/or authors should appear here.

### Experiment Section

#### Powder X-ray diffraction Powder X-ray

diffraction (PXRD) experiments were conducted on a Bruker D8 advance.

#### FTIR

FTIR spectra were acquired in the range of 600–4000 cm<sup>-1</sup> using Vertex 70 (BRUKER Corp, Germany) to examine the incorporation of NIF into CS.

#### TGA

The weight loss curves were obtained using a thermo gravimetric analyzer (TGA) apparatus from 25 to 600 °C at the ramp rate of 5 °C min<sup>-1</sup> under a nitrogen flow.

#### BET detection

The Brunauer–Emmett–Teller (BET) surface area was confirmed by the N<sub>2</sub> adsorption–desorption isotherms (ASAP 2420, Micromeritics) at –196 °C. Before the measurements, the samples were degassed at 200 °C for 12 hours.

#### pH response experiment

The ZIF-NIF-ALG-loaded tetracycline material was placed in a buffer solution of pH

5.4 and pH 7.5, and the supernatant concentration was measured at 350 nm with an ultraviolet spectrophotometer at different time intervals.

### **Zinc Ions Released Properties of ZIF-NIF-ALG**

To study the Zn<sup>2+</sup> ions release amount from the ZIF-NIF-ALG, the material with the concentration of 50 µg/mL were soaked in phosphatebuffered saline (PBS, pH 7.4) at 25°C. The released amounts of Zn<sup>2+</sup> ions at different time scales were then monitored by ICP-OES method.

### **Antibacterial Experiment of Different Materials**

In this study, E.coli (ATCC 6538) was selected as a Gram-negative bacterium, and S.aureus (ATCC 25922) was used as a model for Gram-positive bacteria. E. coli colonies were scraped off and inoculated overnight in 3 mL LB broth. One hundred microliters of the overnight culture was suspended in 3 ml of Mueller-Hinton Broth (MHB) and incubated for 2-3 h to obtain a bacterial culture at a concentration of 5 x 10<sup>6</sup> CFU/mL. The cultured Escherichia coli was diluted to 50 mL, and ZIF-8, ZIF-NIF, ZIF-NIF-ALG, 2-MI, NIF was added thereto. After 24 h of treatment, the sample was removed by centrifugation at 2000 rpm. An aliquot (0.5 mL) was collected and the absorbance was measured at the 600nm with UV visible light. In the blank control experiment, the cultured Escherichia coli was diluted to 50 mL and cultured under the same conditions. After 24 h, an aliquot (0.5 mL) was used and the absorbance was measured at a 600nm using an ultraviolet-spectrophotometer.

### **Integrity of cell membrane.**

Bacterial 's cell membrane integrity was examined by determination of the release of material absorption value at 260 nm. The cultured bacterial were harvested, washed and suspended in sterile physiological saline. The final bacteria suspension was adjusted to an optical density absorbance at 630 nm ( OD<sub>630nm</sub>) of 0.6 to measure OD<sub>260nm</sub>. The complexes solution of 1.0 mg /mL was mixed with bacteria suspension to the ratio of 1:1 ( v /v ) , the absorbance values of the liquid were tested

at different time periods using an ultraviolet spectrophotometer (Rayleigh, UV).

### Stability Test

To assess the stability of ZIF-NIF-ALG, ZIF-NIF-ALG was incubated in freshly diluted mouse blood for 3 days. After the experiment ZIF-NIF-ALG was washed twice with sterile water and dried at room temperature. Then, after coating with platinum sputtering, the morphological change was examined using FESEM.

**Table S1** Specific surface area and pore size data of ZIF-8 and ZIF-NIF

|         | BET Surface Area(m <sup>2</sup> /g) | Adsorption average pore diameter(nm) |
|---------|-------------------------------------|--------------------------------------|
| ZIF-8   | 8.6743                              | 4.14091                              |
| ZIF-NIF | 6.1189                              | 4.61032                              |

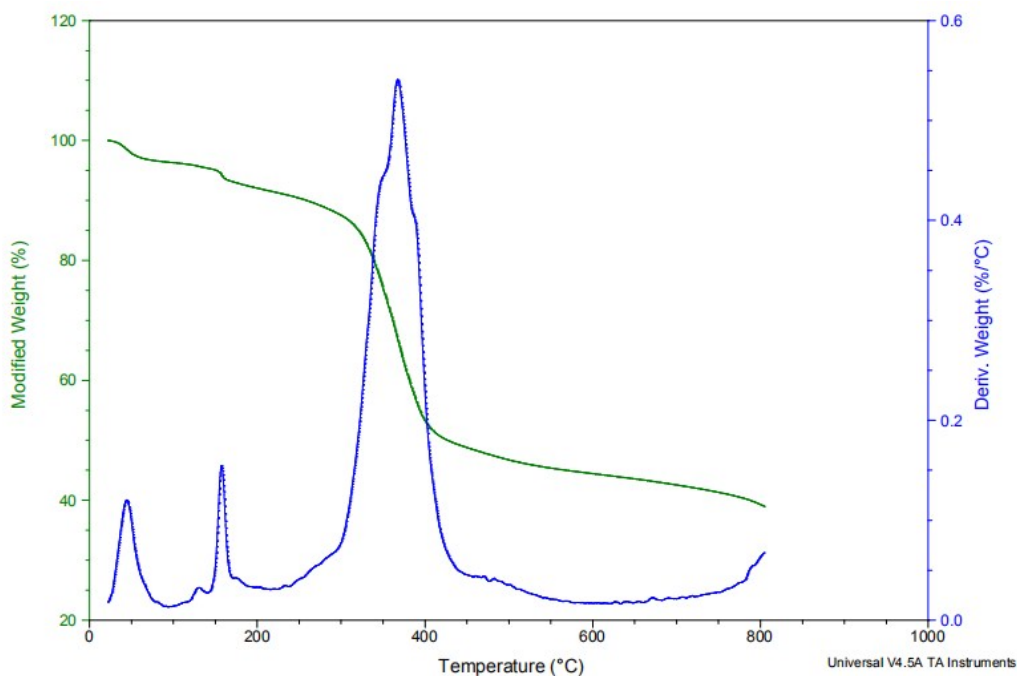

**Fig S1.** Thermogravimetric analysis profile of ZIF-8 .

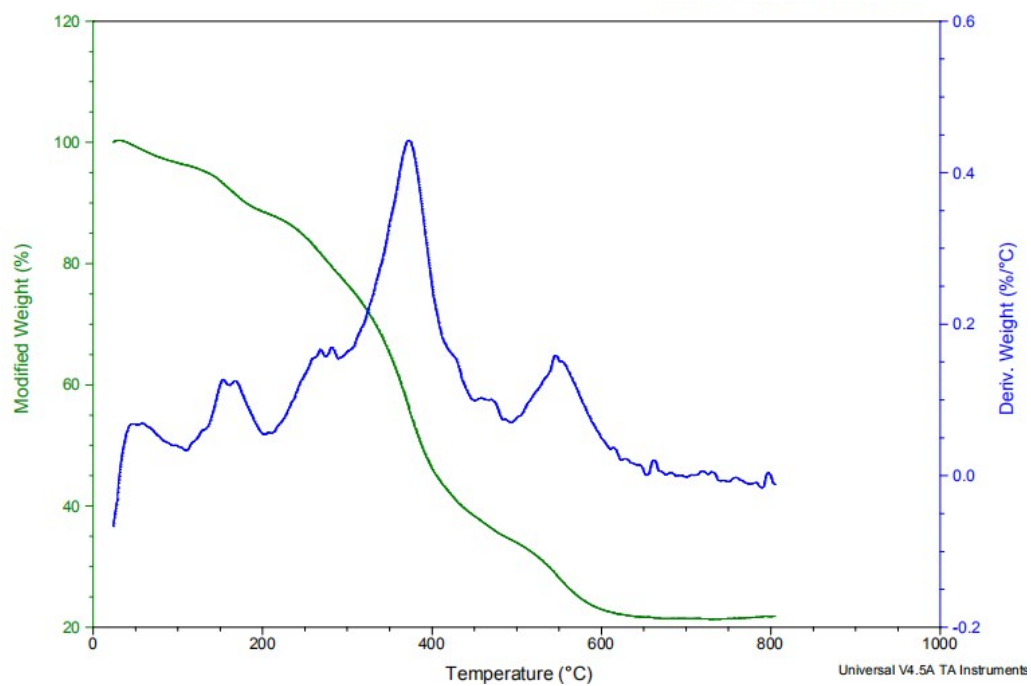

**Fig.S2** Thermogravimetric analysis profile of ZIF-NIF .

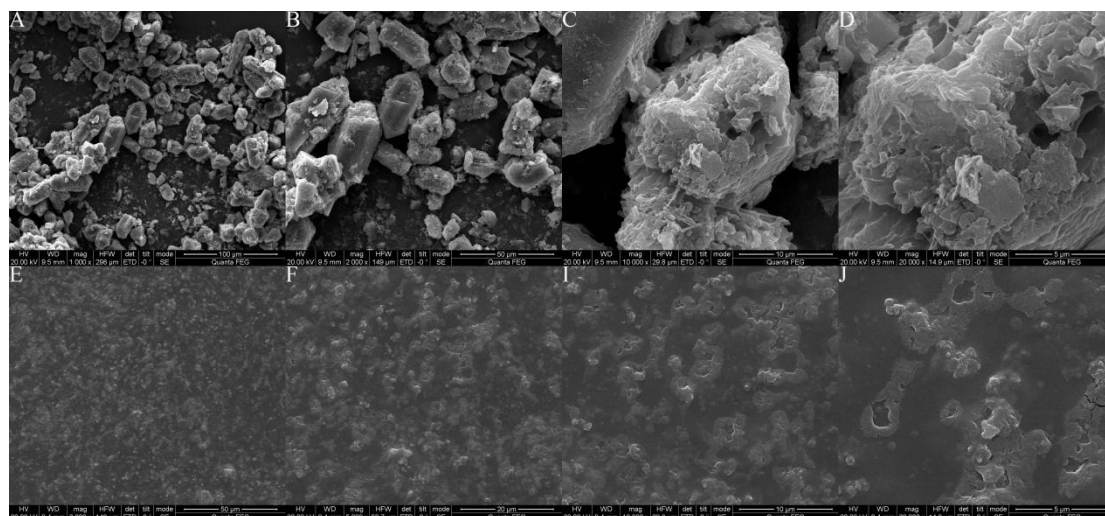

**Fig.S3** (A-D) SEM of ZIF-NIF at different scales;(E-J)SEM of ZIF-NIF-ALG in a slightly acidic environment at different scales.

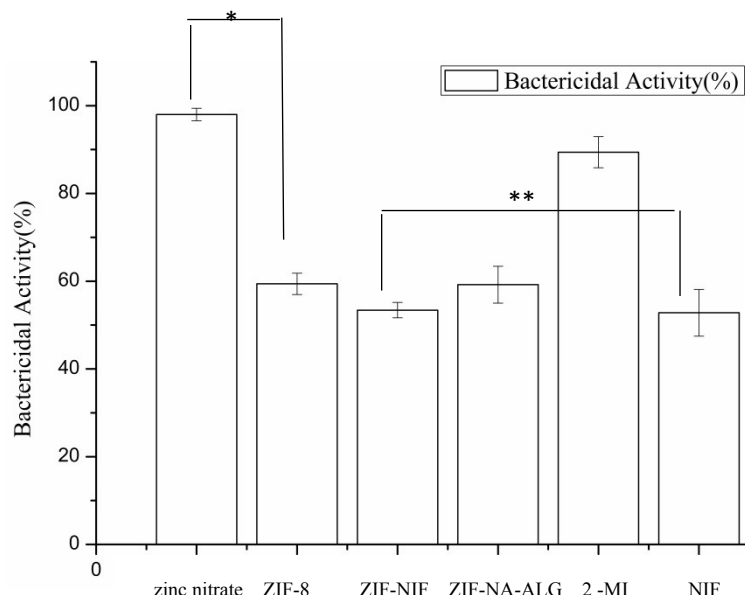

Fig.S4 MIC of different materials.

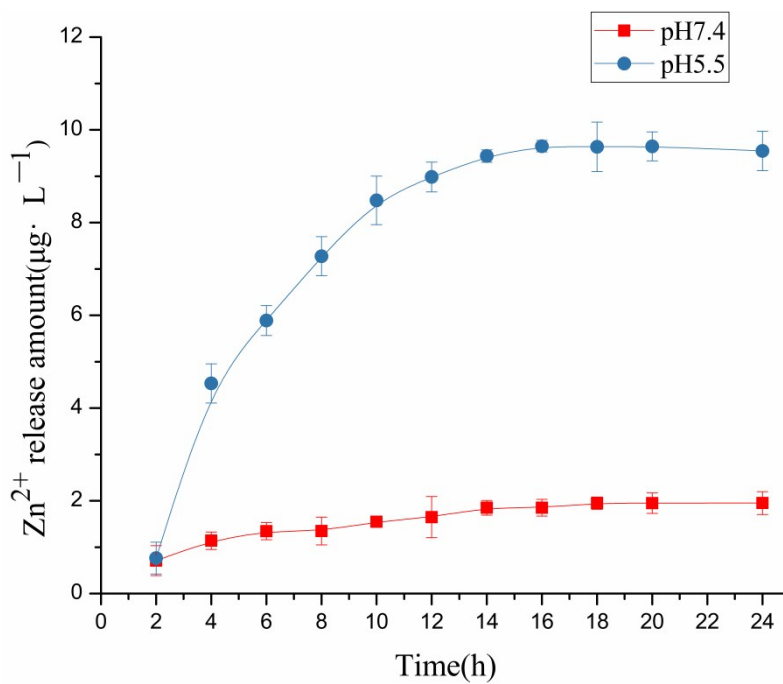

Fig.S5 Release of zinc ions in ZIF-NIF-ALG at pH 5.5 and pH 7.4.

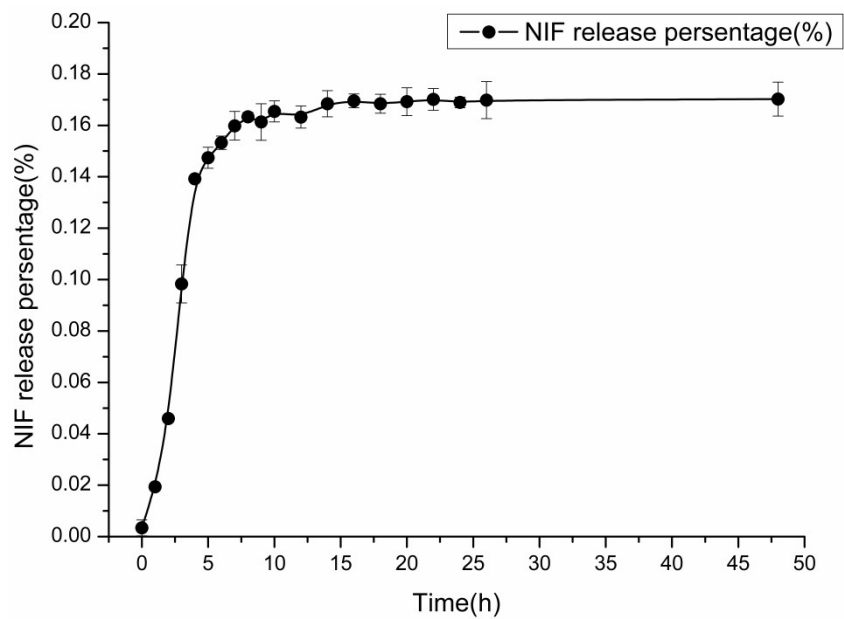

**Fig.S6** Release of niflumic acid in ZIF-NIF-ALG at pH5.5.

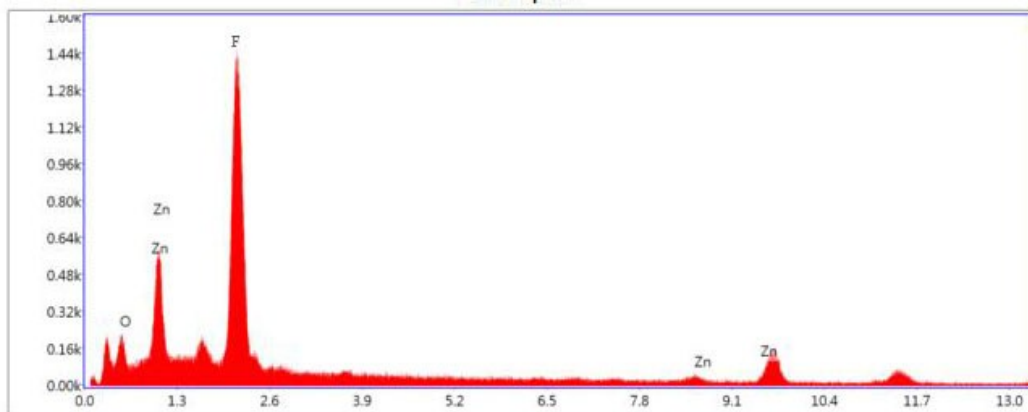

**Fig.S7** EDS analysis of ZIF-NIF-ALG

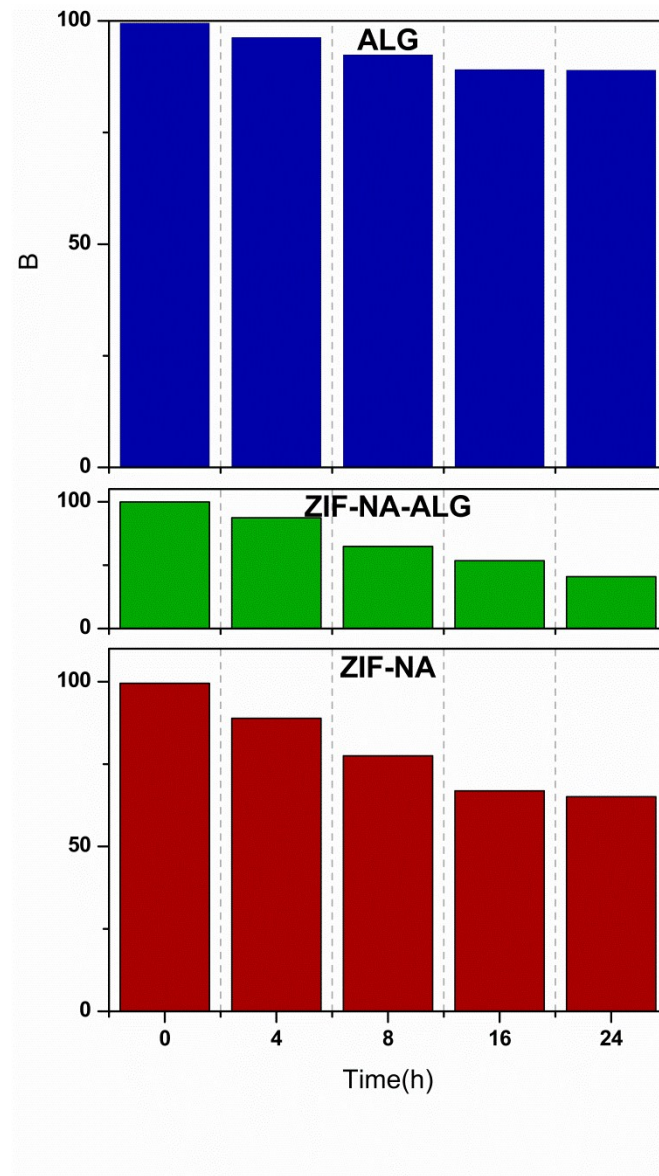

**Fig.S8** Antibacterial effect of ZIF-8\ZIF-NIF\ZIF-NIF-ALG on Escherichia coli within 24h.

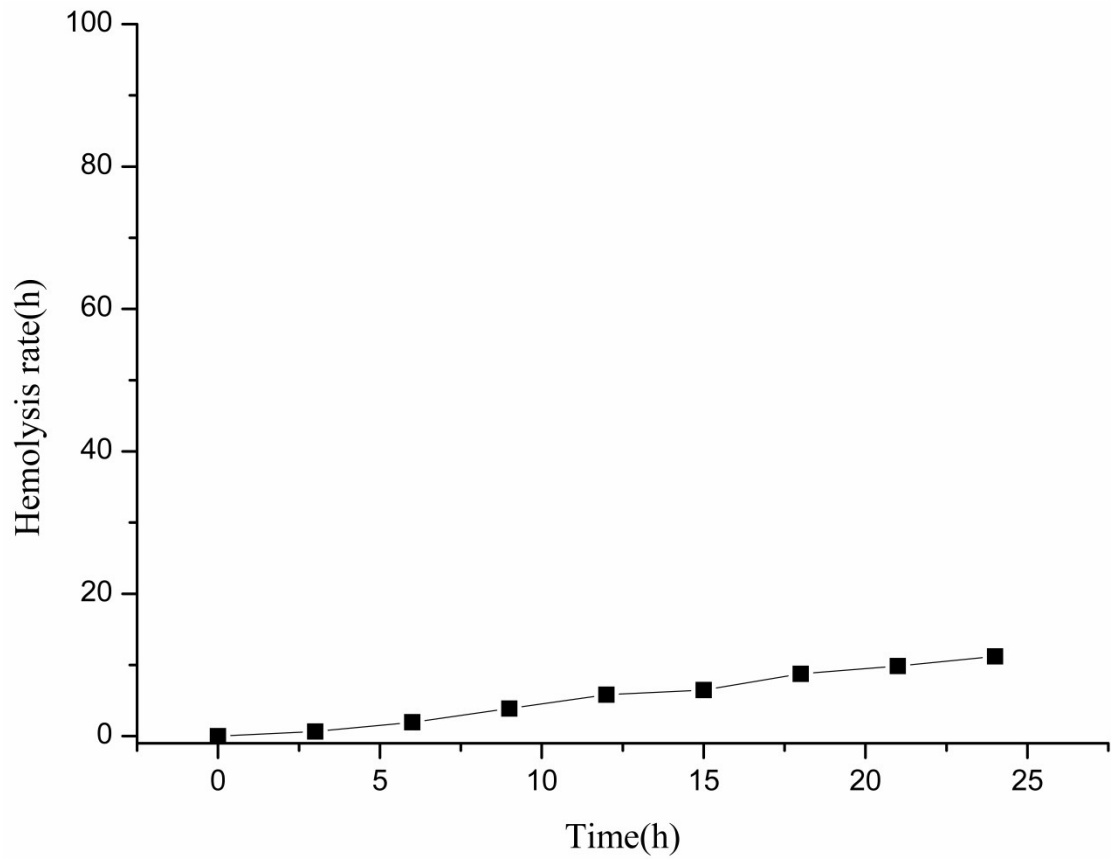

Fig.S9 Hemolysis rate curve of ZIF-NIF-ALG at different times

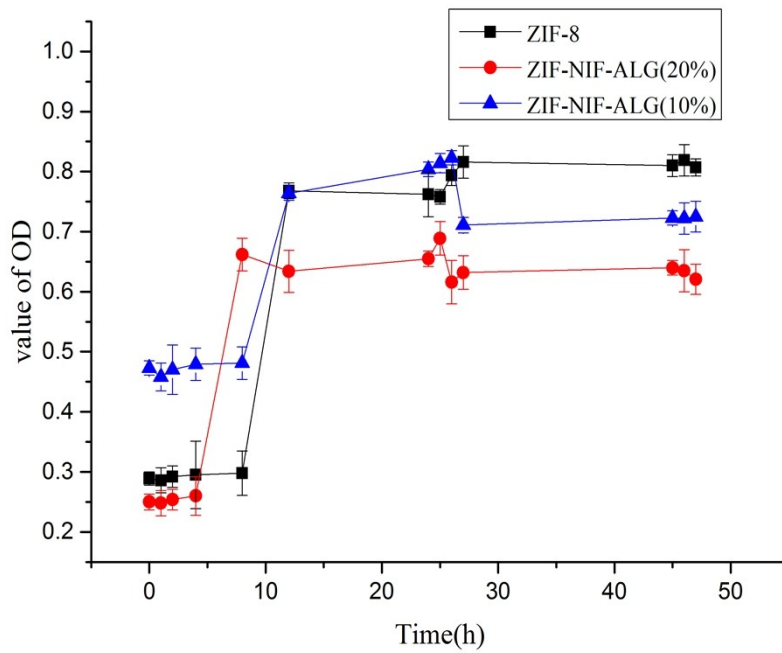

Fig.S10 Effects of ZIF-8, ZIF-NIF-ALG (10%), ZIF-NIF-ALG (20%) on the growth curve of



Staphylococcus aureus
